# Supplementary material
Source: PubMed Central journal article supplement (PMC9070339)
Supplement: ofac178_suppl_supplementary_figure_s1.pdf [file ofac178_suppl_supplementary_figure_s1.pdf]

**Supplementary Figure 1:** Number of test-positive cases and percent vaccinated by epidemiological week among health care workers (HCWs) in the Workplace Health Incident Tracking and Evaluation (WHITE) database, British Columbia, Canada

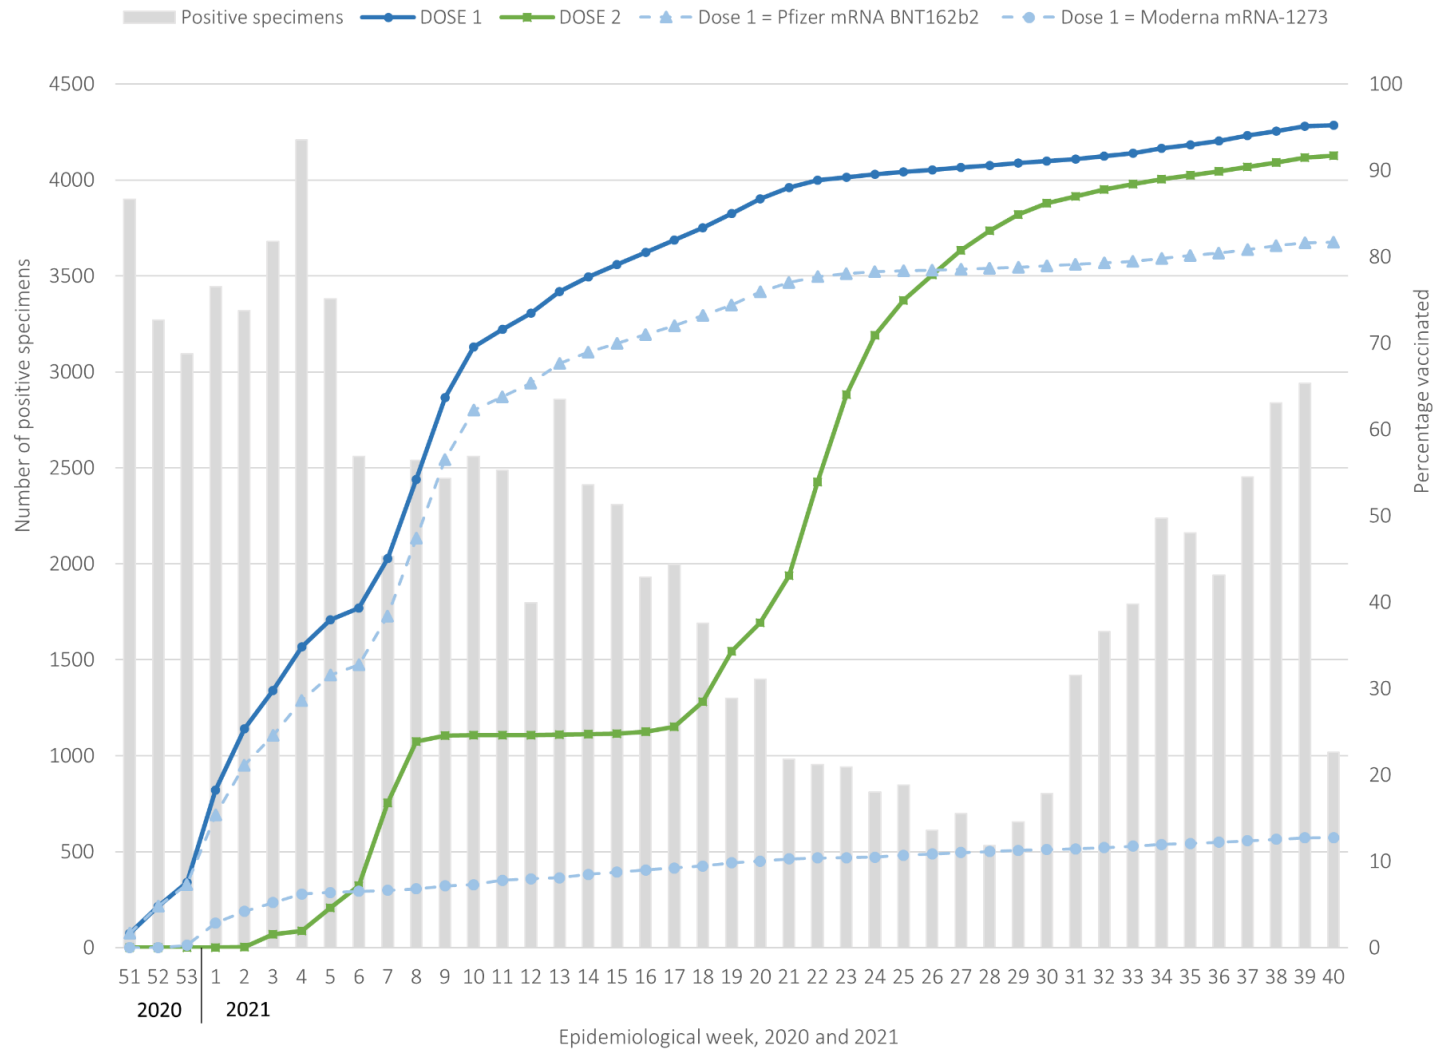

The source population for this figure includes all records in WHITE, without applying any exclusions.

The percentage vaccinated was estimated using the total vaccinated records as a proportion of all records in the WHITE database.

The percentage single-dose vaccinated reflects records in WHITE with *at least* one dose vaccination, while the percentage two-dose vaccinated reflects those with two doses.

Epidemiological week corresponds with the week of test date for the positive specimens' bar-plot, and week of vaccination for all vaccine-coverage line-plots.
