# Supplementary material
Source: PubMed Central journal article supplement (PMC9070339)
Supplement: ofac178_suppl_supplementary_tables.pdf [file ofac178_suppl_supplementary_tables.pdf]

**Supplementary Table 1: Profile of participants in single-dose vaccine effectiveness analyses among health care workers in British Columbia, Canada, epi-weeks 3-30 (January 17 – July 31, 2021)**

| Characteristics                                  | All Specimens |         | Distribution by Case Status |         |          |         | Specimens from vaccinated healthcare workers (HCWs) |         |       |         |          |         |
|--------------------------------------------------|---------------|---------|-----------------------------|---------|----------|---------|-----------------------------------------------------|---------|-------|---------|----------|---------|
|                                                  | N             | %       | Cases                       |         | Controls |         | Overall                                             |         | Cases |         | Controls |         |
|                                                  |               |         | N                           | %       | N        | %       | N                                                   | %       | N     | %       | N        | %       |
| Overall                                          | 8855          |         | 1265                        | (14)    | 7590     | (86)    | 4671                                                | (53)    | 404   | (32)    | 4267     | (56)    |
| Age group (years)                                |               |         |                             |         |          |         |                                                     |         |       |         |          |         |
| 18-29                                            | 410           | (5)     | 339                         | (27)    | 71       | (1)     | 130                                                 | (32)    | 99    | (29)    | 31       | (44)    |
| 30-39                                            | 2163          | (24)    | 376                         | (30)    | 1787     | (24)    | 1221                                                | (56)    | 117   | (31)    | 1104     | (62)    |
| 40-49                                            | 2858          | (32)    | 304                         | (24)    | 2554     | (34)    | 1551                                                | (54)    | 106   | (35)    | 1445     | (57)    |
| 50-59                                            | 2410          | (27)    | 171                         | (14)    | 2239     | (29)    | 1237                                                | (51)    | 57    | (33)    | 1180     | (53)    |
| 60+                                              | 1014          | (11)    | 75                          | (6)     | 939      | (12)    | 532                                                 | (52)    | 25    | (33)    | 507      | (54)    |
| Median age (Interquartile range)                 | 46            | (38-54) | 37                          | (29-47) | 47       | (40-55) | 45                                                  | (39-54) | 39    | (30-47) | 46       | (39-55) |
| Sex                                              |               |         |                             |         |          |         |                                                     |         |       |         |          |         |
| Female                                           | 7742          | (87)    | 1068                        | (84)    | 6674     | (88)    | 4105                                                | (53)    | 340   | (32)    | 3765     | (56)    |
| Male                                             | 1113          | (13)    | 197                         | (16)    | 916      | (12)    | 566                                                 | (51)    | 64    | (32)    | 502      | (55)    |
| Epidemiological week of testing, 2021            |               |         |                             |         |          |         |                                                     |         |       |         |          |         |
| 3-6 (Jan 17-Feb 13)                              | 2044          | (23)    | 292                         | (23)    | 1752     | (23)    | 399                                                 | (20)    | 10    | (3)     | 389      | (22)    |
| 7-10 (Feb 14-Mar 13)                             | 1561          | (18)    | 223                         | (18)    | 1338     | (18)    | 449                                                 | (29)    | 19    | (9)     | 430      | (32)    |
| 11-14 (Mar 14-Apr 10)                            | 1995          | (23)    | 285                         | (23)    | 1710     | (23)    | 1350                                                | (68)    | 109   | (38)    | 1241     | (73)    |
| 15-18 (Apr 11-May 8)                             | 2135          | (24)    | 305                         | (24)    | 1830     | (24)    | 1675                                                | (78)    | 184   | (60)    | 1491     | (81)    |
| 19-22 (May 9-Jun 5)                              | 805           | (9)     | 115                         | (9)     | 690      | (9)     | 641                                                 | (80)    | 67    | (58)    | 574      | (83)    |
| 23-26 (Jun 6-Jul 3)                              | 126           | (1)     | 18                          | (1)     | 108      | (1)     | 79                                                  | (63)    | 6     | (33)    | 73       | (68)    |
| 27-30 (Jul 4-Jul 31)                             | 189           | (2)     | 27                          | (2)     | 162      | (2)     | 78                                                  | (41)    | 9     | (33)    | 69       | (43)    |
| Employee Health authority                        |               |         |                             |         |          |         |                                                     |         |       |         |          |         |
| Fraser                                           | 4090          | (46)    | 724                         | (57)    | 3366     | (44)    | 2253                                                | (55)    | 240   | (33)    | 2013     | (60)    |
| Interior                                         | 1501          | (17)    | 159                         | (13)    | 1342     | (18)    | 716                                                 | (48)    | 35    | (22)    | 681      | (51)    |
| Northern                                         | 301           | (3)     | 75                          | (6)     | 226      | (3)     | 126                                                 | (42)    | 12    | (16)    | 114      | (50)    |
| Vancouver Coastal                                | 1933          | (22)    | 242                         | (19)    | 1691     | (22)    | 1066                                                | (55)    | 102   | (42)    | 964      | (57)    |
| Vancouver Island                                 | 1030          | (12)    | 65                          | (5)     | 965      | (13)    | 510                                                 | (50)    | 15    | (23)    | 495      | (51)    |
| Job category of first job                        |               |         |                             |         |          |         |                                                     |         |       |         |          |         |
| Direct patient care (including nursing)          | 3856          | (44)    | 461                         | (36)    | 3395     | (45)    | 2210                                                | (57)    | 176   | (38)    | 2034     | (60)    |
| Service providers                                | 335           | (4)     | 101                         | (8)     | 234      | (3)     | 144                                                 | (43)    | 27    | (27)    | 117      | (50)    |
| Vaccine name                                     |               |         |                             |         |          |         |                                                     |         |       |         |          |         |
| Moderna mRNA-1273                                |               |         |                             |         |          |         | 384                                                 | (8)     | 22    | (5)     | 362      | (8)     |
| Pfizer mRNA BNT162b2                             |               |         |                             |         |          |         | 4287                                                | (92)    | 382   | (95)    | 3905     | (92)    |
| Time since vaccination (days/weeks)              |               |         |                             |         |          |         |                                                     |         |       |         |          |         |
| 21-27 days (3 weeks)                             |               |         |                             |         |          |         | 611                                                 | (13)    | 32    | (8)     | 579      | (14)    |
| 28-41 days (4-5 weeks)                           |               |         |                             |         |          |         | 1207                                                | (26)    | 78    | (19)    | 1129     | (26)    |
| 42-55 days (6-7 weeks)                           |               |         |                             |         |          |         | 968                                                 | (21)    | 81    | (20)    | 887      | (21)    |
| ≥56 days (≥ 8 weeks)                             |               |         |                             |         |          |         | 1885                                                | (40)    | 213   | (53)    | 1672     | (39)    |
| Median (Interquartile range) (days) <sup>a</sup> |               |         |                             |         |          |         | 49                                                  | (34-69) | 57    | (40-76) | 48       | (34-68) |
| Range (days)                                     |               |         |                             |         |          |         |                                                     | 21-182  |       | 21-180  |          | 21-182  |

<sup>a</sup>Among health care worker (HCW) participants tested ≥21 days since the first dose and with test-negative controls matched in a 6:1 ratio. For single-dose vaccinated HCWs, tested and matched without regard to time since vaccination, the median time since vaccination was 38 days [interquartile range (IQR): 19-61, range: 0-182]; 41.5 days [IQR: 14-65, range: 0-180] for the single-dose vaccinated cases; and 38 days [IQR: 19-61, range: 0-182] for the single-dose vaccinated controls.

**Supplementary Table 2:** Adjusted one and two-dose mRNA vaccine effectiveness against any SARS-CoV-2 infection by days since vaccination among health care workers, British Columbia, Canada

| Days since vaccination                 | Study period<br>(epidemiological weeks) | Cases |            | Controls |            | Adjusted<br>(conditioned) for<br>Matching Week |          | Fully Adjusted <sup>a</sup> |          |
|----------------------------------------|-----------------------------------------|-------|------------|----------|------------|------------------------------------------------|----------|-----------------------------|----------|
|                                        |                                         | All   | Vaccinated | All      | Vaccinated | VE %                                           | (95% CI) | VE %                        | (95% CI) |
| <b>Single-dose VE</b>                  |                                         |       |            |          |            |                                                |          |                             |          |
| 0-13 days (0-1 week)                   | 3-30                                    | 1004  | 143        | 6024     | 1297       | 41                                             | (29,51)  | 36                          | (21,47)  |
| 14-20 days (2 weeks)                   | 3-30                                    | 902   | 41         | 5412     | 864        | 76                                             | (67,83)  | 75                          | (64,82)  |
| 21-27 days (3 weeks)                   | 3-30                                    | 893   | 32         | 5358     | 793        | 80                                             | (72,86)  | 79                          | (69,85)  |
| 28-41 days (4-5 weeks)                 | 3-30                                    | 939   | 78         | 5634     | 1421       | 76                                             | (70,82)  | 75                          | (67,81)  |
| 42-55 days (6-7 weeks)                 | 3-30                                    | 942   | 81         | 5652     | 1162       | 72                                             | (63,78)  | 69                          | (59,76)  |
| ≥56 days (≥8 weeks)                    | 3-30                                    | 1074  | 213        | 6444     | 2017       | 64                                             | (56,71)  | 61                          | (52,69)  |
| <b>Two-dose VE</b>                     |                                         |       |            |          |            |                                                |          |                             |          |
| 0-6 days                               | 9-30                                    | 483   | 11         | 2898     | 178        | 71                                             | (43,85)  | 69                          | (41,84)  |
| 7-13 days (1 week)                     | 9-30                                    | 475   | 3          | 2850     | 253        | 95                                             | (84,98)  | 95                          | (84,98)  |
| 14-20 days (2 weeks)                   | 9-30                                    | 473   | 1          | 2838     | 278        | 99                                             | (90,100) | 99                          | (90,100) |
| 21-27 days (3 weeks)                   | 9-30                                    | 474   | 2          | 2844     | 237        | 96                                             | (86,99)  | 96                          | (85,99)  |
| 28-34 days (4 weeks)                   | 9-30                                    | 475   | 3          | 2850     | 256        | 95                                             | (84,98)  | 96                          | (86,99)  |
| 35-41 days (5 weeks)                   | 9-30                                    | 477   | 5          | 2862     | 311        | 93                                             | (83,97)  | 94                          | (85,98)  |
| 42-55 days (6-7 weeks)                 | 9-35                                    | 626   | 16         | 3130     | 807        | 95                                             | (91,97)  | 95                          | (91,97)  |
| 56-83 days (8-11 weeks)                | 11-39                                   | 733   | 119        | 4398     | 2234       | 89                                             | (87,92)  | 89                          | (85,91)  |
| 84-111 days (12-15 weeks) <sup>b</sup> | 15-39                                   | 552   | 114        | 2760     | 1626       | 93                                             | (90,94)  | 91                          | (88,93)  |
| 112-195 days (16-27 weeks)             | 20-39                                   | 444   | 151        | 2664     | 2073       | 89                                             | (85,91)  | 86                          | (83,89)  |
| ≥196 days (≥28 weeks)                  | 35-39                                   | 224   | 96         | 1344     | 1075       | 83                                             | (77,88)  | 82                          | (75,87)  |

VE = vaccine effectiveness; CI = confidence interval

<sup>a</sup> Conditional logistic regression model adjusted for age group (18-29, 30-39, 40-49, 50-59, 60+ years), sex (male or female), and health authority of HCW's residence (Fraser Health Authority, Interior Health Authority, Northern Health Authority, Vancouver Island Health Authority, and Vancouver Coastal Health Authority) using the matching epidemiological week of testing as strata.

<sup>b</sup> Ratio of matched controls to cases reduced to 5:1 per epidemiological week of testing due insufficient number of controls in some weeks for 6:1 matching.

**Supplementary Table 3:** Adjusted two-dose mRNA vaccine effectiveness against any SARS-CoV-2 infection, by interval between doses and days since vaccination, among healthcare workers in British Columbia, Canada

| Two-dose VE by interval between doses and time since vaccination | Study period (epidemiological weeks) | Cases |            | Controls |            | Adjusted (conditioned) for matching week |          | Fully adjusted <sup>a</sup> |          |  |
|------------------------------------------------------------------|--------------------------------------|-------|------------|----------|------------|------------------------------------------|----------|-----------------------------|----------|--|
|                                                                  |                                      | All   | Vaccinated | All      | Vaccinated | VE %                                     | (95% CI) | VE %                        | (95% CI) |  |
| <b>3-5 week interval</b>                                         |                                      |       |            |          |            |                                          |          |                             |          |  |
| 14-41 days (2-5 weeks)                                           | 9-30                                 | 475   | 3          | 2850     | 159        | 90                                       | (68,97)  | 88                          | (62,96)  |  |
| 42-69 days (6-9 weeks)                                           | 9-30                                 | 478   | 6          | 2868     | 223        | 86                                       | (67,94)  | 86                          | (68,94)  |  |
| 70-111 days (10-15 weeks)                                        | 9-30                                 | 477   | 5          | 2862     | 172        | 85                                       | (63,94)  | 85                          | (63,94)  |  |
| 112-195 days (16-27 weeks)                                       | 9-30                                 | 476   | 4          | 2856     | 112        | 85                                       | (57,95)  | 86                          | (58,95)  |  |
| ≥196 days (≥ 28 weeks) <sup>b</sup>                              | 35-39                                | 149   | 21         | 596      | 312        | 86                                       | (77,91)  | 87                          | (79,93)  |  |
| <b>6 week interval</b>                                           |                                      |       |            |          |            |                                          |          |                             |          |  |
| 14-41 days (2-5 weeks)                                           | 9-30                                 | 474   | 2          | 2844     | 442        | 98                                       | (93,100) | 98                          | (93,100) |  |
| 42-69 days (6-9 weeks)                                           | 9-30                                 | 484   | 12         | 2904     | 550        | 92                                       | (85,96)  | 93                          | (87,96)  |  |
| 70-111 days (10-15 weeks)                                        | 9-30                                 | 490   | 18         | 2940     | 380        | 84                                       | (74,91)  | 85                          | (74,91)  |  |
| 112-195 days (16-27 weeks)                                       | 9-39                                 | 759   | 48         | 4280     | 884        | 86                                       | (80,90)  | 87                          | (81,90)  |  |
| ≥196 days (≥ 28 weeks) <sup>b</sup>                              | 35-39                                | 200   | 72         | 800      | 591        | 83                                       | (76,88)  | 79                          | (69,85)  |  |
| <b>≥7 week interval</b>                                          |                                      |       |            |          |            |                                          |          |                             |          |  |
| 14-41 days (2-5 weeks)                                           | 9-30                                 | 478   | 6          | 2868     | 251        | 95                                       | (87,98)  | 95                          | (87,98)  |  |
| 42-69 days (6-9 weeks)                                           | 9-35                                 | 649   | 39         | 3894     | 932        | 93                                       | (89,95)  | 92                          | (88,94)  |  |
| 70-111 days (10-15 weeks)                                        | 9-39                                 | 875   | 164        | 5250     | 2188       | 92                                       | (90,94)  | 91                          | (88,93)  |  |
| 112-195 days (16-27 weeks) <sup>c</sup>                          | 35-39                                | 204   | 76         | 1020     | 867        | 92                                       | (89,95)  | 91                          | (86,94)  |  |
| ≥196 days (≥ 28 weeks) <sup>d</sup>                              |                                      |       |            |          |            |                                          |          |                             |          |  |

VE = vaccine effectiveness; CI = confidence interval

<sup>a</sup>Conditional logistic regression model adjusted for age group (18-29, 30-39, 40-49, 50-59, 60+ years), sex (male or female), and health authority of HCW's residence (Fraser Health Authority, Interior Health Authority, Northern Health Authority, Vancouver Island Health Authority, and Vancouver Coastal Health Authority) using the matching epidemiological week of testing as strata.

<sup>b</sup>Ratio of matched controls to cases reduced to 4:1 per epidemiological week of testing due to less sufficient number of controls in some weeks.

<sup>c</sup>Ratio of matched controls to cases reduced to 5:1 per epidemiological week of testing due to less sufficient number of controls in some weeks.

<sup>d</sup>Insufficient time and observations to present estimates in this duration and interval.
